# Supplementary material for: Common Cancer Biomarkers
Source: Oxford University Press journal article supplement (doi:10.1158/0008-5472.can-05-3433), 2006-03-15
Supplement: 00085472can053433-sup-can_3-15-06_basil.xls [file 00085472can053433-sup-can_3-15-06_basil.xls]

## Sheet: Sheet1
Gene symbol	Description	Clone	UG cluster
PTHR1	Parathyroid hormone receptor 1	IMAGE:1323328	Hs.1019
CKB	Creatine kinase, brain	IMAGE:1416782	Hs.173724
CDH5	Cadherin 5, type 2, VE-cadherin (vascular epithelium)	IMAGE:151104	Hs.76206
VEGF	Vascular endothelial growth factor	IMAGE:34778	Hs.73793
MYC	c-myc	IMAGE:812965	Hs.202453
TGFB2	Transforming growth factor, beta 2	IMAGE:666218	Hs.133379
TIMP1	Tissue inhibitor of metalloproteinase 1 (erythroid potentiating activity, collagenase inhibitor)	IMAGE:240766	Hs.522632
LDHC	Lactate dehydrogenase C	IMAGE:795178	Hs.99881
SELE	selectin E=ELAM1=endothelial leukocyte adhesion molecule I	IMAGE:186132	Hs.89546
TYK2	tyk2=non-receptor protein tyrosine kinase=tyrosine kinase 2	IMAGE:756452	Hs.75516
PRKCG	Protein kinase C, gamma	IMAGE:167032	Hs.2890
PRKCB1	PKC beta =Protein kinase C beta 1	IMAGE:753923	Hs.349845
PSMA1	Proteasome (prosome, macropain) subunit, alpha type, 1	IMAGE:134544	Hs.102798
PECAM1	Platelet/endothelial cell adhesion molecule (CD31 antigen)	IMAGE:130541	Hs.514412
PLAUR	Plasminogen activator, urokinase receptor	IMAGE:810017	Hs.466871
NGFB	NGF-beta=Nerve growth factor beta	IMAGE:72869	Hs.2561
ICAM3	CD50=ICAM-3	IMAGE:754080	Hs.353214
IGF1	Insulin-like growth factor 1 (somatomedin C)	IMAGE:813179	Hs.160562
MEIS1	Meis1, myeloid ecotropic viral integration site 1 homolog (mouse)	IMAGE:361943	Hs.526754
GAP43	Growth associated protein 43	IMAGE:44563	Hs.134974
GSTM3	Glutathione S-transferase M3 (brain)	IMAGE:137940	Hs.2006
PRKCA	Protein kinase C, alpha	IMAGE:768246	Hs.531704
FUT4	Fucosyltransferase 4 (alpha (1,3) fucosyltransferase, myeloid-specific)	IMAGE:133213	Hs.390420
CYB5	Cytochrome b-5	IMAGE:196189	Hs.465413
CSF3R	G-CSF receptor	IMAGE:809639	Hs.381027
F11	Coagulation factor XI (plasma thromboplastin antecedent)	IMAGE:244387	Hs.1430
CTSE	Cathepsin E	IMAGE:243202	Hs.1355
CTSD	Cathepsin D (lysosomal aspartyl protease)	IMAGE:264117	Hs.546248
CD34	CD34	IMAGE:770858	Hs.374990
BRCA1	BRCA1=Mutated in breast and ovarian cancer	IMAGE:241474	Hs.194143
BMP6	Bone morphogenetic protein 6	IMAGE:768168	Hs.285671
MKI67	Ki67 (long type)	IMAGE:769513	Hs.80976
ANXA1	Annexin A1	IMAGE:208718	Hs.494173
ADH5	Alcohol dehydrogenase 5 (class III), chi polypeptide	IMAGE:813711	Hs.78989
ADH1B	Alcohol dehydrogenase IB (class I), beta polypeptide	IMAGE:307231	Hs.4
APC	Adenomatosis polyposis coli	IMAGE:812083	Hs.158932
ACTA1	Actin, alpha 1, skeletal muscle	IMAGE:366511	Hs.1288
VIM	Vimentin	IMAGE:840511	Hs.533317
VCAM1	CD106=VCAM-1	IMAGE:49164	Hs.109225
BRAF	B-raf Ser/Thr protein kinase	IMAGE:417403	Hs.162967
ABL1	abl tyrosine-protein kinase	IMAGE:897642	Hs.446504
TP53	p53	IMAGE:24415	Hs.408312
TGFB3	Transforming growth factor, beta 3	IMAGE:486208	Hs.2025
PRG1	Proteoglycan 1, secretory granule	IMAGE:703581	Hs.1908
PCNA	PCNA=proliferating cell nuclear antigen	IMAGE:789182	Hs.78996
PLG	Plasminogen	IMAGE:85979	Hs.143436
ODC1	Ornithine decarboxylase 1	IMAGE:796646	Hs.467701
MX1	MxA=interferon-induced cellular resistance mediator protein	IMAGE:815542	Hs.436836
MUC1	Mucin 1, transmembrane	IMAGE:840687	Hs.89603
INSR	Insulin receptor	IMAGE:427812	Hs.465744
HK1	Hexokinase 1	IMAGE:840158	Hs.118625
MSH2	MSH2=DNA mismatch repair mutS homologue	IMAGE:630013	Hs.440394
CYC1	Cytochrome c-1	IMAGE:813830	Hs.289271
CCND1	Cyclin D1=BCL1=PRAD1=Translocated in mantle cell lymphoma and multiple myeloma	IMAGE:841641	Hs.371468
CTNNB1	Catenin (cadherin-associated protein), beta 1, 88kDa	IMAGE:774754	Hs.476018
RET	Ret proto-oncogene (multiple endocrine neoplasia and medullary thyroid carcinoma 1, Hirschsprung disease)	IMAGE:160664	Hs.350321
EGFR	Epidermal growth factor receptor (erythroblastic leukemia viral (v-erb-b) oncogene homolog, avian)	IMAGE:324861	Hs.488293
CDH11	Cadherin 11, type 2, OB-cadherin (osteoblast)	IMAGE:491113	Hs.116471
TNNT2	Troponin T2, cardiac	IMAGE:298062	Hs.533613
TNNI2	Troponin I, skeletal, fast	IMAGE:611532	Hs.523403
TIMP3	Tissue inhibitor of metalloproteinase 3 (Sorsby fundus dystrophy, pseudoinflammatory)	IMAGE:489519	Hs.297324
RB1	RB = retinoblastoma susceptibility gene	IMAGE:487777	Hs.408528
PRKD1	Protein kinase D1	IMAGE:284001	Hs.508999
PTEN	MMAC1=PTEN=Tumor suppressor gene at 10q23.3 that is Mutated in Multiple Advanced Cancers=Phosphatase and tensin homolog	IMAGE:322160	Hs.253309
NGFR	Low-affinity nerve growth factor receptor=NGF receptor=GP80-LNGFR	IMAGE:154790	Hs.415768
LGALS3	Lectin, galactoside-binding, soluble, 3 (galectin 3)	IMAGE:855910	Hs.531081
ICAM2	CD102=ICAM-2=intercellular adhesion molecule 2	IMAGE:130201	Hs.433303
ICAM1	CD54=ICAM-1	IMAGE:145112	Hs.515126
NR4A1	Nak1=TR3 orphan receptor=homologue of Nur77/NGIF-B/N10 anti-apoptotic gene	IMAGE:309893	Hs.1119
GRP	Gastrin-releasing peptide	IMAGE:469306	Hs.153444
ESR1	Estrogen receptor	IMAGE:725321	Hs.1657
CCNE1	Cyclin E1	IMAGE:68950	Hs.244723
COL4A2	collagen, type IV, alpha 2	IMAGE:769959	Hs.407912
CHGB	Secretogranin I=Chromogranin B	IMAGE:322148	Hs.2281
CTSC	Cathepsin C	IMAGE:845355	Hs.128065
BRCA2	BRCA2=Mutated in breast and ovarian cancer	IMAGE:193736	Hs.34012
BF	B-factor, properdin	IMAGE:741977	Hs.69771
BCL2	BCL-2	IMAGE:342181	Hs.79241
ATM	ATM alternate 3' end	IMAGE:360778	Hs.526394
ANXA5	Annexin A5	IMAGE:786680	Hs.480653
AFP	Alpha-fetoprotein	IMAGE:74537	Hs.518808
ACTA2	Actin, alpha 2, smooth muscle, aorta	IMAGE:868304	Hs.500483
TNNI1	Troponin I, skeletal, slow	IMAGE:611581	Hs.320890
RAD51AP1	RAD51 associated protein 1	IMAGE:730124	Hs.504550
ITGB3	CD61=Integrin beta 3=platelet glycoprotein IIIa	IMAGE:484874	Hs.87149
APOD	Apolipoprotein D	IMAGE:838611	Hs.522555
PRKCZ	PKC zeta=Protein kinase C, zeta	IMAGE:814266	Hs.107101
ADA	Adenosine deaminase	IMAGE:505881	Hs.407135
PSMA7	Proteasome (prosome, macropain) subunit, alpha type, 7	IMAGE:1455641	Hs.233952
EFEMP1	EGF-containing fibulin-like extracellular matrix protein 1	IMAGE:1492230	Hs.76224
CALCRL	Calcitonin receptor-like	IMAGE:1326920	Hs.470882
REG1B	Regenerating islet-derived 1 beta (pancreatic stone protein, pancreatic thread protein)	IMAGE:1412300	Hs.4158
PDPK1	3-phosphoinositide dependent protein kinase-1	IMAGE:266720	Hs.459691
RAD51L3	RAD51D	IMAGE:259579	Hs.125244
MEIS4	Meis1, myeloid ecotropic viral integration site 1 homolog 4 (mouse)	IMAGE:450152	Hs.356135
MMP11	Matrix metalloproteinase 11 (stromelysin 3)	IMAGE:487296	Hs.143751
B2M	Beta-2-microglobulin	IMAGE:878798	Hs.534255
XRCC3	XRCC3=DNA recombination and DNA crosslinking repair RAD51-related protein	IMAGE:814287	Hs.512716
ADH6	Alcohol dehydrogenase 6 (class V)	IMAGE:212021	Hs.518892
TGFB1	Transforming growth factor, beta 1 (Camurati-Engelmann disease)	IMAGE:136821	Hs.1103
ALB	Albumin	IMAGE:292613	Hs.418167
PSMA6	Proteasome (prosome, macropain) subunit, alpha type, 6	IMAGE:509495	Hs.446260
PIK3CA	Phosphoinositide-3-kinase, catalytic, alpha polypeptide	IMAGE:345430	Hs.553498
MYCN	N-myc	IMAGE:41565	Hs.25960
ABCB1	MDR1=Multidrug resistance protein 1=P-glycoprotein	IMAGE:813256	Hs.21330
PTPRK	Protein tyrosine phosphatase, receptor type, K	IMAGE:146123	Hs.155919
KLK6	Kallikrein 6 (neurosin, zyme)	IMAGE:809784	Hs.79361
DLG3	Discs, large homolog 3 (neuroendocrine-dlg, Drosophila)	IMAGE:33327	Hs.522680
MYCL1	L-myc	IMAGE:138917	Hs.437922
INSIG1	Insulin induced gene 1	IMAGE:207288	Hs.520819
DDR2	Receptor protein tyrosine kinase TKT precursor=Tyrosine protein kinase TYRO 10=Neurotrophic tyrosine kinase receptor-related 3=discoidin domain receptor family, member 2	IMAGE:668442	Hs.440905
CDH1	E-cadherin	IMAGE:251019	Hs.194657
MAPK3	mitogen-activated protein kinase 3=erk1=extracellular signal-regulated kinase 1	IMAGE:809939	Hs.861
ERBB2	HER2=neu=c-erb-B-2=tyrosine kinase-type receptor	IMAGE:783729	Hs.446352
TNNT3	Troponin T3, skeletal, fast	IMAGE:788695	Hs.73454
PSMA5	Proteasome (prosome, macropain) subunit, alpha type, 5	IMAGE:897952	Hs.485246
PSMA3	Proteasome (prosome, macropain) subunit, alpha type, 3	IMAGE:814246	Hs.531089
LDHA	Lactate dehydrogenase A	IMAGE:897567	Hs.2795
SST	Somatostatin	IMAGE:39593	Hs.12409
FHL1	Four and a half LIM domains 1	IMAGE:813266	Hs.435369
OAZ1	Ornithine decarboxylase antizyme 1	IMAGE:841617	Hs.446427
MGLL	Monoglyceride lipase	IMAGE:81394	Hs.277035
IGFBP3	Insulin-like growth factor binding protein 3	IMAGE:898218	Hs.450230
CDK4	Cyclin-dependent kinase 4	IMAGE:842806	Hs.95577
PNPLA4	Patatin-like phospholipase domain containing 4	IMAGE:785745	Hs.264
AKAP1	A kinase (PRKA) anchor protein 1	IMAGE:814765	Hs.78921
AKAP1	A kinase (PRKA) anchor protein 1	IMAGE:814765	Hs.78921
JUN	V-jun sarcoma virus 17 oncogene homolog (avian)	IMAGE:358531	Hs.525704
MEIS2	Meis1, myeloid ecotropic viral integration site 1 homolog 2 (mouse)	IMAGE:503083	Hs.510989
KLK10	Kallikrein 10	IMAGE:810960	Hs.275464
PRKCD	Protein kinase C, delta	IMAGE:755301	Hs.155342
FOS	V-fos FBJ murine osteosarcoma viral oncogene homolog	IMAGE:811015	Hs.25647
TSG101	Tumor susceptibility gene 101	IMAGE:878744	Hs.523512
ACTC	Actin, alpha, cardiac muscle	IMAGE:302933	Hs.118127
RAD51L1	RAD51B=Recombination/repair Rad51-related protein	IMAGE:295412	Hs.509754
SIGLEC5	Sialic acid binding Ig-like lectin 5	IMAGE:455115	Hs.310333
CDH6	Cadherin 6, type 2, K-cadherin (fetal kidney)	IMAGE:739155	Hs.171054
MMP14	MMP-14=Matrix metalloproteinase 14=MT-1-MMP=membrane-type matrix metalloproteinase 1=63 KD MMP =	IMAGE:270505	Hs.2399
NEU1	Sialidase 1 (lysosomal sialidase)	IMAGE:725176	Hs.520037
EGR3	EGR-3=PILOT=T cell transcription factor=bridging integrator 3	IMAGE:26568	Hs.74088
CEACAM5	Carcinoembryonic antigen-related cell adhesion molecule 5	IMAGE:586706	Hs.220529
RAD51C	RAD51 homolog C (S. cerevisiae)	IMAGE:80162	Hs.412587
NME1	Non-metastatic cells 1, protein (NM23A) expressed in	IMAGE:845363	Hs.118638
CDH17	Cadherin 17, LI cadherin (liver-intestine)	IMAGE:511909	Hs.89436
PSMA4	Proteasome (prosome, macropain) subunit, alpha type, 4	IMAGE:531862	Hs.251531
MSH5	MutS homolog 5 (E. coli)	IMAGE:1046542	Hs.371225
IRS1	Insulin receptor substrate 1	IMAGE:813168	Hs.471508
KLKB1	Kallikrein B, plasma (Fletcher factor) 1	IMAGE:245662	Hs.1901
CYP19A1	Cytochrome P450, family 19, subfamily A, polypeptide 1	IMAGE:70573	Hs.511367
PRKCE	Protein kinase C, epsilon	IMAGE:815151	Hs.97432
EGF	Epidermal growth factor (beta-urogastrone)	IMAGE:2159880	Hs.419815
SRC	V-src sarcoma (Schmidt-Ruppin A-2) viral oncogene homolog (avian)	IMAGE:2310235	Hs.195659
NAGK	N-acetylglucosamine kinase	IMAGE:2312508	Hs.7036
BAG3	BCL2-associated athanogene 3=BAG3=Bcl-2-binding protein BIS=BAG-family molecular chaperone regulator-3=docking protein CAIR-1	IMAGE:486054	Hs.15259
CDK2	cdk2=Cyclin-dependent kinase 2	IMAGE:269242	Hs.19192
CTSL2	Cathepsin L2	IMAGE:2408378	Hs.87417
TACR2	Tachykinin receptor 2	IMAGE:2488831	Hs.88372
KLK8	Kallikrein 8 (neuropsin/ovasin)	IMAGE:2514426	Hs.104570
PRL	Prolactin	IMAGE:504236	Hs.1905
KRT19	Keratin 19	IMAGE:810131	Hs.514167
CDH8	Cadherin 8, type 2	IMAGE:40751	Hs.368322
OAZ2	Ornithine decarboxylase antizyme 2	IMAGE:66535	Hs.74563
MAG	Myelin associated glycoprotein	IMAGE:32444	Hs.515354
FGF18	Fibroblast growth factor 18	IMAGE:364563	Hs.87191
RAD51C	RAD51C=Recombination/repair Rad51-related protein	IMAGE:26997	Hs.412587
KLK13	Kallikrein 13	IMAGE:743113	Hs.165296
PRKCZ	PKC zeta=Protein kinase C, zeta	IMAGE:814266	Hs.107101
FLRT1	Fibronectin leucine rich transmembrane protein 1	IMAGE:30963	Hs.550507
FLRT3	Fibronectin leucine rich transmembrane protein 3	IMAGE:812143	Hs.41296
PALM2-AKAP2	PALM2-AKAP2 protein	IMAGE:450423	Hs.259461
IFNG	Interferon gamma	IMAGE:1579639	Hs.856
SP1	Sp1	IMAGE:271416	Hs.9460
TNF	Tumor necrosis factor (TNF superfamily, member 2)	IMAGE:446927	Hs.241570
ERBB3	V-erb-b2 erythroblastic leukemia viral oncogene homolog 3 (avian)	IMAGE:855563	Hs.118681
PSMA2	Proteasome (prosome, macropain) subunit, alpha type, 2	IMAGE:366104	Hs.333786
BCAR3	Breast cancer anti-estrogen resistance 3	IMAGE:279670	Hs.36958
CDH16	Cadherin 16, KSP-cadherin	IMAGE:1590245	Hs.513660
CALM1	Calmodulin 1 (phosphorylase kinase, delta)	IMAGE:796087	Hs.282410
TNNI3	Troponin I, cardiac	IMAGE:591597	Hs.512709
CA9	Carbonic anhydrase IX	IMAGE:1643566	Hs.63287
BCL2L1	BCL2-like 1	IMAGE:1568561	Hs.516966
SELPLG	Selectin P ligand	IMAGE:1609625	Hs.506670
KLK7	Kallikrein 7 (chymotryptic, stratum corneum)	IMAGE:1710172	Hs.151254
TG	Thyroglobulin	IMAGE:1837653	Hs.546309
RAD51AP1	RAD51 associated protein 1	IMAGE:1839367	Hs.504550
ADH6	Alcohol dehydrogenase 6 (class V)	IMAGE:1866852	Hs.518892
FLRT2	Fibronectin leucine rich transmembrane protein 2	IMAGE:1932984	Hs.533710
ICAM4	Intercellular adhesion molecule 4, Landsteiner-Wiener blood group	IMAGE:2062332	Hs.386467
SIGLEC6	Sialic acid binding Ig-like lectin 6	IMAGE:258572	Hs.397255
CDH4	Cadherin 4, type 1, R-cadherin (retinal)	IMAGE:392092	Hs.473231
BAZ2A	Fucosyltransferase 1 (galactoside 2-alpha-L-fucosyltransferase)	IMAGE:530485	Hs.314263
SIGLEC7	sialic acid binding Ig-like lectin 7=D-siglec=expressed in dendritic cells	IMAGE:1849100	Hs.274470
IRS2	Insulin receptor substrate 2	IMAGE:2108551	Hs.442344
CRISP3	CRISP-3=cysteine-rich secretory protein-3=target of Oct-2=specific granule protein (28 kDa)	IMAGE:2119355	Hs.404466
PGR	Progesterone receptor	IMAGE:2161427	Hs.368072
SELP	Selectin P (granule membrane protein 140kDa, antigen CD62)	IMAGE:2249736	Hs.73800
TTLL1	Tubulin tyrosine ligase-like family, member 1	IMAGE:2250441	Hs.416038
AR	Androgen receptor (dihydrotestosterone receptor; testicular feminization; spinal and bulbar muscular atrophy; Kennedy disease)	IMAGE:2250839	Hs.496240
HK3	Hexokinase 3 (white cell)	IMAGE:1695734	Hs.411695
TERT	Telomerase catalytic subunit=EST2	IMAGE:2304672	Hs.439911
PAP	Regenerating islet-derived 3 alpha	IMAGE:2394534	Hs.423
TGFA	Transforming growth factor, alpha	IMAGE:2400152	Hs.170009
ADH7	Alcohol dehydrogenase 7 (class IV), mu or sigma polypeptide	IMAGE:2406661	Hs.389
TNNC1	Troponin C, slow	IMAGE:2488961	Hs.118845
KLK12	Kallikrein 12	IMAGE:2109677	Hs.411572
ADH1C	Alcohol dehydrogenase 1C (class I), gamma polypeptide	IMAGE:2186327	Hs.2523
BAX	BCL2-associated X protein	IMAGE:2569476	Hs.159428
INS	Insulin	IMAGE:2323669	Hs.89832
FUT3	Fucosyltransferase 3 (galactoside 3(4)-L-fucosyltransferase, Lewis blood group included)	IMAGE:2509539	Hs.169238
GCG	Glucagon	IMAGE:2511749	Hs.516494
LDHB	Lactate dehydrogenase B	IMAGE:2563391	Hs.446149
CYC1	Cytochrome c-1	IMAGE:22260	Hs.289271
CALM2	Calmodulin 2 (phosphorylase kinase, delta)	IMAGE:34355	Hs.468442
CKB	Creatine kinase, brain	IMAGE:37451	Hs.173724
LDHA	Lactate dehydrogenase A	IMAGE:43550	Hs.2795
GAPD	Glyceraldehyde-3-phosphate dehydrogenase	IMAGE:50117	Hs.544577
CDH13	Cadherin 13, H-cadherin (heart)	IMAGE:50941	Hs.436040
GAPD	Glyceraldehyde-3-phosphate dehydrogenase	IMAGE:530934	Hs.544577
GAPD	Glyceraldehyde-3-phosphate dehydrogenase	IMAGE:530868	Hs.544577
SCC-112	SCC-112 protein	IMAGE:124079	Hs.331431
PALM2-AKAP2	PALM2-AKAP2 protein	IMAGE:282108	Hs.259461
FUT11	Fucosyltransferase 11 (alpha (1,3) fucosyltransferase)	IMAGE:838999	Hs.500082
MET	Met proto-oncogene (hepatocyte growth factor receptor)	IMAGE:626841	Hs.132966
CD44	CD44 antigen (homing function and Indian blood group system)	IMAGE:328868	Hs.502328
CYP19A1	Cytochrome P450, family 19, subfamily A, polypeptide 1	IMAGE:148954	Hs.511367
HERC2	Hect domain and RLD 2	IMAGE:219717	Hs.434890
CAMTA1	Calmodulin binding transcription activator 1	IMAGE:396214	Hs.397705
PALM2-AKAP2	PALM2-AKAP2 protein	IMAGE:262695	Hs.259461
PSMA4	Proteasome (prosome, macropain) subunit, alpha type, 4	IMAGE:645184	Hs.251531
PSMA2	Proteasome (prosome, macropain) subunit, alpha type, 2	IMAGE:366104	Hs.333786
PALM2-AKAP2	PALM2-AKAP2 protein	IMAGE:1467868	Hs.259461
HERC2	Hect domain and RLD 2	IMAGE:1470474	Hs.434890
CAMTA2	Calmodulin binding transcription activator 2	IMAGE:1621820	Hs.373952
SIGLEC5	Sialic acid binding Ig-like lectin 5	IMAGE:199605	Hs.310333
CEACAM5	CEA=carcinoembryonic antigen	IMAGE:510405	Hs.220529
RET	Ret=Receptor tyrosine kinase oncogene mutated in multiple endocrine neoplasia MEN2A MEN2B and medullary thyroid carcinoma 1 Hirschsprung disease	IMAGE:1516955	Hs.350321
TFR2	Transferrin receptor 2	IMAGE:2408681	Hs.544932
PLAUR	Plasminogen activator, urokinase receptor	IMAGE:2421798	Hs.466871
PSMA3	Proteasome (prosome, macropain) subunit, alpha type, 3	IMAGE:2437098	Hs.531089
MAG	Myelin associated glycoprotein	IMAGE:2469109	Hs.515354
DES	Desmin	IMAGE:2490569	Hs.471419
PSMA2	Proteasome (prosome, macropain) subunit, alpha type, 2	IMAGE:2505262	Hs.333786
OAZ1	Ornithine decarboxylase antizyme 1	IMAGE:2556738	Hs.446427
FNDC3B	Fibronectin type III domain containing 3B	IMAGE:259066	Hs.159430
NSE1	NSE1	IMAGE:283190	Hs.260855
BAZ2A	Fucosyltransferase 1 (galactoside 2-alpha-L-fucosyltransferase)	IMAGE:416107	Hs.314263
ABCB1	ATP-binding cassette, sub-family B (MDR/TAP), member 1	IMAGE:502721	Hs.489033
FTH1	Ferritin, heavy polypeptide 1	IMAGE:810700	Hs.448738
MGLL	Monoglyceride lipase	IMAGE:627676	Hs.277035
FNDC3B	Fibronectin type III domain containing 3B	IMAGE:240295	Hs.159430
PSMA3	Proteasome (prosome, macropain) subunit, alpha type, 3	IMAGE:772410	Hs.531089
FNDC1	Fibronectin type III domain containing 1	IMAGE:754126	Hs.520525
CD44	CD44 antigen (homing function and Indian blood group system)	IMAGE:151430	Hs.502328
PRKCE	Protein kinase C, epsilon	IMAGE:166510	Hs.97432
MSH6	MutS homolog 6 (E. coli)	IMAGE:270365	Hs.445052
PDPK1	3-phosphoinositide dependent protein kinase-1	IMAGE:277185	Hs.459691
NSE2	Breast cancer membrane protein 101	IMAGE:278572	Hs.124951
MEIS1	Meis1, myeloid ecotropic viral integration site 1 homolog (mouse)	IMAGE:280592	Hs.526754
STN2	Stonin 2	IMAGE:280602	Hs.14248
PNPT1	Polyribonucleotide nucleotidyltransferase 1	IMAGE:290560	Hs.388733
GCC2	GRIP and coiled-coil domain containing 2	IMAGE:855236	Hs.436505
CYB5	Cytochrome b-5	IMAGE:855392	Hs.465413
ERBB3	V-erb-b2 erythroblastic leukemia viral oncogene homolog 3 (avian)	IMAGE:855563	Hs.118681
FNDC4	Fibronectin type III domain containing 4	IMAGE:233679	Hs.27836
PGR	Progesterone receptor	IMAGE:868188	Hs.368072
OAZ2	Ornithine decarboxylase antizyme 2	IMAGE:867751	Hs.74563
TFRC	Transferrin receptor (p90, CD71)	IMAGE:460233	Hs.529618
PRKCB1	Protein kinase C, beta 1	IMAGE:460453	Hs.460355
TTLL3	Tubulin tyrosine ligase-like family, member 3	IMAGE:1434899	Hs.517782
NSE1	NSE1	IMAGE:1474156	Hs.260855
PTEN	Phosphatase and tensin homolog (mutated in multiple advanced cancers 1)	IMAGE:1535806	Hs.500466
CALM2	Calmodulin 2 (phosphorylase kinase, delta)	IMAGE:1569394	Hs.468442
ABL1	V-abl Abelson murine leukemia viral oncogene homolog 1	IMAGE:489968	Hs.431048
MEIS1	Meis1=cooperates with Hox genes and induces myeloid leukemia in mice	IMAGE:307506	Hs.170177
CALM1	Calmodulin 1 (phosphorylase kinase, delta)	IMAGE:796087	Hs.282410
AFP	Alpha-fetoprotein	IMAGE:68265	Hs.518808
PRKCD	PKC delta=Protein kinase C, delta	IMAGE:428733	Hs.155342
TIMP3	TIMP-3=Tissue inhibitor of metalloproteinase 3	IMAGE:754106	Hs.245188
TTLL4	Tubulin tyrosine ligase-like family, member 4	IMAGE:839770	Hs.471405
TNNI3	Troponin I, cardiac	IMAGE:591597	Hs.512709
CSF1	Colony stimulating factor 1 (macrophage)	IMAGE:1475574	Hs.173894
PCSK6	Proprotein convertase subtilisin/kexin type 6	IMAGE:415962	Hs.498494
GCC2	GRIP and coiled-coil domain containing 2	IMAGE:683023	Hs.436505
PDPK1	3-phosphoinositide dependent protein kinase-1	IMAGE:1536925	Hs.459691
MMP11	Matrix metalloproteinase 11 (stromelysin 3)	IMAGE:1574438	Hs.143751
CHGA	Chromogranin A (parathyroid secretory protein 1)	IMAGE:1585535	Hs.150793
CALCRL	Calcitonin receptor-like	IMAGE:1588477	Hs.470882
BCL2L1	BCL2-like 1	IMAGE:1568561	Hs.516966
EGF	Epidermal growth factor	IMAGE:1577736	Hs.419815
CD44	CD44 antigen (homing function and Indian blood group system)	IMAGE:82421	Hs.502328
CDH1	Cadherin 1, type 1, E-cadherin (epithelial)	IMAGE:79598	Hs.461086
GCC2	GRIP and coiled-coil domain containing 2	IMAGE:272179	Hs.436505
IGF1	Insulin-like growth factor 1 (somatomedin C)	IMAGE:286633	Hs.160562
IGF1	IGF-I=insulin-like growth factor 1	IMAGE:287327	Hs.308053
BAZ2A	Fucosyltransferase 1 (galactoside 2-alpha-L-fucosyltransferase)	IMAGE:530485	Hs.314263
FNDC3B	Fibronectin type III domain containing 3B	IMAGE:626874	Hs.159430
GCC2	GRIP and coiled-coil domain containing 2	IMAGE:768405	Hs.436505
PRKCE	Protein kinase C, epsilon	IMAGE:726798	Hs.97432
CDH5	Cadherin 5, type 2, VE-cadherin (vascular epithelium)	IMAGE:151104	Hs.76206
ERBB3	V-erb-b2 erythroblastic leukemia viral oncogene homolog 3 (avian)	IMAGE:1160531	Hs.118681
ABL2	V-abl Abelson murine leukemia viral oncogene homolog 2 (arg, Abelson-related gene)	IMAGE:250966	Hs.159472
GSTM1	Glutathione S-transferase M1	IMAGE:180561	Hs.301961
FUT1	Fucosyltransferase 1 (galactoside 2-alpha-L-fucosyltransferase)	IMAGE:1499828	Hs.69747
SIGLEC7	sialic acid binding Ig-like lectin 7=D-siglec=expressed in dendritic cells	IMAGE:1849100	Hs.274470
TNF	Tumor necrosis factor (TNF superfamily, member 2)	IMAGE:1851134	Hs.241570
ADH1C	Alcohol dehydrogenase 1C (class I), gamma polypeptide	IMAGE:2095066	Hs.2523
TACR2	Tachykinin receptor 2	IMAGE:2095235	Hs.88372
IRS2	Insulin receptor substrate 2	IMAGE:2108551	Hs.442344
CRISP3	CRISP-3=cysteine-rich secretory protein-3=target of Oct-2=specific granule protein (28 kDa)	IMAGE:2119355	Hs.404466
BAX	BCL2-associated X protein	IMAGE:2125819	Hs.159428
PGR	Progesterone receptor	IMAGE:2161427	Hs.368072
TTLL1	Tubulin tyrosine ligase-like family, member 1	IMAGE:2250441	Hs.416038
CDK2	Cyclin-dependent kinase 2	IMAGE:2308346	Hs.19192
ERBB4	V-erb-a erythroblastic leukemia viral oncogene homolog 4 (avian)	IMAGE:2029080	Hs.390729
BAG3	BCL2-associated athanogene 3	IMAGE:2043167	Hs.523309
ICAM1	CD54=ICAM-1	IMAGE:293413	Hs.515126
CALCB	Calcitonin-related polypeptide, beta	IMAGE:2467525	Hs.534305
DES	Desmin	IMAGE:2490569	Hs.471419
FUT3	Fucosyltransferase 3 (galactoside 3(4)-L-fucosyltransferase, Lewis blood group included)	IMAGE:2509539	Hs.169238
GCG	Glucagon	IMAGE:2511749	Hs.516494
CTNNB1	Catenin (cadherin-associated protein), beta 1, 88kDa	IMAGE:2544350	Hs.476018
KRT19	Keratin 19	IMAGE:2568350	Hs.514167
CKB	Creatine kinase, brain	IMAGE:2570810	Hs.173724
TIMP1	Tissue inhibitor of metalloproteinase 1 (erythroid potentiating activity, collagenase inhibitor)	IMAGE:2572015	Hs.522632
FHL1	Four and a half LIM domains 1	IMAGE:2577002	Hs.435369
BAZ2A	Fucosyltransferase 1 (galactoside 2-alpha-L-fucosyltransferase)	IMAGE:2577057	Hs.314263
CALM2	Calmodulin 2 (phosphorylase kinase, delta)	IMAGE:2577949	Hs.468442
MMP9	matrix metalloproteinase 9 (gelatinase B, 92kD gelatinase, 92kD type IV collagenase)	P50045
NGFR	nerve growth factor receptor (TNFRSF16) associated protein 1	P45312
	selectin P ligand	P50109
CSF1	colony stimulating factor 1 (macrophage)	P46216
IL2	Interleukin 2	EnaW-9k-97a1	Hs.89679
